# Supplementary material
Source: publisher site journal article supplement (https://www.dovepress.com/get_supplementary_file.php?f=511639.docx)
Supplement: Supplementary file 1 [file get_supplementary_file.php]

# Supplementary Material for “The application of checklist in chronic disease: A comprehensive bibliometric analysis”

**Table of Contents**

[Supplementary Search strategy 2](#_Toc920)

[Supplementary S1 Table 8](#_Toc9823)

[Supplementary S2 Table 10](#_Toc2321)

[Supplementary S3 Table 1](#_Toc10137)1

[Supplementary S4 Table 1](#_Toc10137)4

Supplementary [Standardised Keywords](#_Toc10137) 23

**Search strategy**

**#1 137169**

TI=(checklist* OR list* OR listing OR handbook OR to-do OR guidebook OR planner OR agenda OR worksheet)

**#2 21555**

TI=(“Chronic Disease*” OR “Chronic lllness*” OR “Chronic Condition*” OR “Noncommunicable Disease*” OR “Noninfectious Disease*” OR “Non-communicable Disease*” OR “Non communicable Chronic Disease*”)

**#3 62247**

TI=(“Cardiovascular Disease*” OR “Cardiac Event*” OR “Adverse Cardiac Event*” OR “Major Adverse Cardiac Event*”)

**#4 144506**

TI=(“Coronary Disease*” OR “Coronary Heart Disease*” OR “myocardial infarct*” OR “heart attack*”)

**#5 6579**

TI=(“Peripheral arterial disease*” OR “peripheral angiopath*” OR “peripheral arterial disease*” OR “phlebitis” OR “raynaud disease*”)

**#6 1938**

TI=(“Rheumatic heart disease*” OR “Bouillaud Disease*”)

**#7 76282**

TI=(“cardiomyopath*” OR “cardio-myopath*” OR “myocarditis” OR “myocardial disease*” OR “endomyocardial fibrosis”)

**#8 196777**

TI=(“hypertension” OR “high blood pressure*”)

**#9 2432**

TI=(“Heart Valve Disease*” OR “Valvular Heart Disease*”)

**#10 122825**

TI=(“Arrhythmia” OR “Arrythmia” OR “Cardiac Arrhythmia*” OR “Cardiac Dysrhythmia or bradycardia*” OR “tachycardia*” OR “heart block*” OR “ventricular fibrillation*” OR “atrial fibrillation*”)

**#11 325300**

TI=(“aneurysm*” OR “aortic rupture*” OR “endoleak*” OR “microaneurysm*” OR “heart disease*” OR “heart failure” OR “cardiac failure” OR “cardiac edema*” OR “cardia oedema*” OR “cardiac arrest*”)

**#12 31649**

TI=(“cardiomegaly” OR “hypertrophy” OR “enlarged heart” OR “heart enlarge*”)

**#13 126254**

TI=(“thrombosis” OR “thrombus” OR “thromboses” OR “thromboembolism*” OR “embolism*” OR “thrombophlebitis*” OR “lemierre syndrome”)

**#14 59276**

TI=(“arteriosclerosis” OR “atherosclerosis” OR “atheromata*” OR “atherogenesis”)

**#15 5691**

TI=(“Cerebrovascular Disorder*” OR “Brain Vascular Disorder*” OR “Intracranial Vascular Disorder*” OR “Intracranial Vascular Disease*” OR “Cerebrovascular Disease*” OR “Cerebrovascular Insufficiency” OR “Cerebrovascular Occlusion*”)

**#16 204334**

TI=(“stroke*” OR “Cerebrovascular Accident*” OR “Cerebral Stroke*” OR “Cerebrovascular Apoplexy” OR “Brain Vascular Accident*” OR “Cerebrovascular Stroke*” OR “Apoplexy” OR “CVA* (Cerebrovascular Accident)” OR “Acute Stroke*” OR “Acute Cerebrovascular Accident*”)

**#17 12290**

TI=(“Carotid artery disease*” OR “Carotid Arterial Disease*” OR “Carotid Artery Disorder*” OR “External Carotid Artery Disease*” OR “Internal Carotid Artery Disease*” OR “Carotid Atheroscleros*s” OR “Carotid Atherosclerotic Disease*” OR “Common Carotid Artery Disease*” OR “arterial disease*”)

**#18 3461**

TI=(“vascular dementia*” OR “Arteriosclerotic Dementia*” OR “Binswanger Disease” OR “Binswanger Encephalopathy” OR “Chronic Progressive Subcortical Encephalopathy” OR “Subcortical Leukoencephalopathy*” OR “Encephalopathy, Subcortical Arteriosclerotic” OR “Encephalopathy, Chronic Progressive Subcortical” OR “Subcortical Encephalopathy, Chronic Progressive” OR “Subcortical Leukoencephalopathy” OR “Subcortical Arteriosclerotic Encephalopathy*” OR “Binswanger's Encephalopathy” OR “Binswanger's Disease” OR “Subcortical Vascular Dementia*” OR “Acute Onset Vascular Dementia”)

**#19 10628**

TI=(“arteriovenous malformation*”)

**#20 16667**

TI=(“intracranial hemorrhage*” OR “Brain Hemorrhage*” OR “Posterior Fossa Hemorrhage*” OR “Cerebral Hemorrhage*” OR “Intracerebral Hemorrhage*” OR “Cerebrum Hemorrhage*” OR “Cerebral Brain Hemorrhage*” OR “Cerebral Parenchymal Hemorrhage*”)

**#21 14**

TI=(“cerebrovascular trauma” OR “Brain Vascular Injury*” OR “Brain Vascular Trauma*”)

**#22 102**

TI=(“vascular headache*” OR “Vascular Cephalgia*”)

**#23 1087**

TI=(“central nervous system vasculitis”OR “Central Nervous System Angiitis” OR “CNS Vasculitis” OR “Cerebral Angiitis” OR “Cerebral Vasculitis” OR “Granulomatous Angiitis” OR “Granulomatous Arteritis” OR “Postzoster Arteritis” OR “Primary CNS Vasculitis” OR “Primary Central Nervous System Vasculitis” OR “Secondary CNS Vasculitis”)

**#24 2282**

TI=(“Intracranial vasospasm*” OR “Intracranial Vascular Spasm*” OR “Intracranial Angiospasm*” OR “Cerebral Vasospasm*” OR “Cerebrovascular Spasm*” OR “Cerebral Angiospasm*” OR “Cerebral Artery Spasm*”)

**#25 103032**

TI=(“Brain Infarction*” OR “Brain Infarct*” OR “Brain Venous Infarction*” OR “Anterior Cerebral Circulation Infarction” OR “Anterior Circulation Brain Infarction” OR “Posterior Circulation Brain Infarction” OR “Ischemia*”)

**#26 3489761**

TI=(“Neoplasm*” OR “Tumor*” OR “Tumour*” OR “Neoplasia” OR “Neoplasm*” OR “Cancer*” OR “Malignant Neoplasm*” OR “Malignancy*” OR “Benign Neoplasm*” OR “carcinoma*” OR “adenocarcinoma*” OR “malignanc*” OR “ependymoma*” OR “leukemia*” OR “lymphoma*” OR “sarcoma*” OR “rhabdomyosarcoma*” OR “osteosarcoma*” OR “adenoma*” OR “carcinosarcoma*” OR “blastoma*” OR “nephroma*” OR “thymoma*” OR “melanoma*” OR “retinoblastoma*”)

**#27 72989**

TI=(“Chronic Obstructive Pulmonary Disease*” OR “COPD” OR “Chronic Obstructive Lung Disease” OR “Chronic Obstructive Pulmonary Disease*” OR “COAD” OR “Chronic Obstructive Airway Disease” OR “Chronic Airflow Obstruction*” OR “chronic bronchitis” OR “pulmonary emphysema*”)

**#28 126531**

TI=(“Asthma*” OR “Bronchial Asthma”)

**#29 537351**

TI=(“Diabetes Mellitus” OR “diabetes” OR “diabetic” OR “IDDM” OR “wolfram syndrome*” OR “T1DM” OR “T2DM” OR “NIDDM”)

**#30 43512**

TI=(“Mental Disorder*” OR “Mental Illness*” OR “Psychiatric Disorder*” OR “Psychiatric Disease*” OR “Psychiatric Illness*” OR “Behavior Disorders” OR “Psychiatric Diagnosis” OR “Severe Mental Disorder*”)

**#31 11676**

TI=(“Sleep Wake Disorder*” OR “Sleep Disorder*” OR “Long Sleeper Syndrome*” OR “Short Sleeper Syndrome*” OR “Short Sleep Phenotype*” OR “Sleep-Related Neurogenic Tachypnea” OR “Subwakefullness Syndrome*”)

**#32 348707**

TI=(depression*” OR “depressive disorder*” OR “anxiet*” OR “dementia”)

**#33 71420**

TI=((drug or substance or alcohol or opioid or fentanyl or marijuana or cocaine or tobacco or amphetamine) AND (addiction* or abus* or dependenc* or disorder*))

**#34 123817**

TI=(“HIV Infection*” OR “HTLV-III Infection*” OR “HTLV-III-LAV Infection*” OR “T-Lymphotropic Virus Type III Infections, Human” OR “HIV Coinfection*” OR “acquired immunodeficiency syndrome*” OR “AIDS” OR “AIDS arteritis” OR “AIDS virus” OR “AIDS related” OR “AIDS dementia” OR “human immunodeficiency virus*” OR “HIV seropositivit*” OR “HIV wasting syndrome*”)

**#35 99940**

TI=(“Inflammatory Bowel Disease*” OR “Mucous Colitides” OR “Mucous Colitis” OR “Irritable Colon” OR “ulcerative colitis” OR “crohn* disease*” OR “irritable bowel syndrome*”)

**#36 40777**

TI=(“Osteoporosis” OR “Age-Related Osteoporosis” OR “Age-Related Bone Loss*” OR “Senile Osteoporosis” OR “Osteoporosis, Involutional” OR “Post-Traumatic Osteoporosis”)

**#37 176952**

TI=(“Arthritis” OR “Arthritides” OR “Polyarthritis” OR “Polyarthritides” OR “Oligoarthritis” OR “Oligoarthritides” OR “gout” OR “caplan syndrome” OR “sjogren* syndrome” OR “rheumatoid nodule” OR “rheumatoid vasculitis” OR “still* disease*” OR “periarthritis” OR “rheumatic fever” OR “spondylarthritis”)

**#38 170563**

TI=(“Obesity” OR “overweight” OR “Excess weight” OR “Fatness” OR “Adiposity” OR “Overfat”)

**#39 42871**

TI=("Chronic Renal Insufficienc*" OR "Chronic Kidney Insufficienc*" OR "Chronic Kidney Disease*" OR "Chronic Renal Disease*")

**#40 379**

TI=("Chronic Mucocutaneous Candidias*s")

**#41 16**

TI=("Chemical and Drug Induced Liver Injury, Chronic" OR "Chronic Drug Induced Liver Injury" OR "Chemical Induced Liver Injury, Chronic" OR "Hepatitis, Chronic, Drug-Related")

**#42 51**

TI=("Chronic Brain Damage" OR "Chronic Encephalopathy")

**#43 6598689**

#2 OR #3 OR #4 OR #5 OR #6 OR #7 OR #8 OR #10 OR #9 OR #11 OR #12 OR #13 OR #14 OR #15 OR #16 OR #17 OR #18 OR #19 OR #20 OR #21 OR #22 OR #23 OR #24 OR #25 OR #26 OR #27 OR #28 OR #29 OR #30 OR #31 OR #32 OR #33 OR #34 OR #35 OR #36 OR #37 OR #38 OR #39 OR #40 OR #41 OR #42

**#44 4847**

#43 AND #1

**#45 2418**

#44 And Languages = “English” AND Document Types = “Article or Review”

**S1 Table** Country collaboration

| **From** | **Freq** | **To (Countries with collaboration)** |
| --- | --- | --- |
| China | 27 | the United Kingdom (4), Japan (4), Australia (3), Italy (3), Singapore (3), Switzerland (2), Austria (1), Brazil (1), Germany (1), Korea (1), Norway (1), Spain (1), Sweden (1), U Arab Emirates (1) |
| Spain | 25 | France (6), Austria (3), Belgium (3), Switzerland (3), Sweden (2), Brazil (1), Czech Republic (1), Denmark (1), Jordan (1), Luxembourg (1), Poland (1), Serbia (1), Singapore (1) |
| Australia | 22 | Spain (3), France (2), Switzerland (2), Singapore (2), Iran (2), Netherlands (2), Belgium (1), Brazil (1), Canada (1), Denmark (1), Germany (1), Indonesia (1), Japan (1), Serbia (1), South Africa (1) |
| Switzerland | 16 | Belgium (3), Austria (2), Chile (2), Poland (2), Turkey (2), Czech Republic (1), Jordan (1), Norway (1), Russia (1), Serbia (1) |
| Germany | 14 | Switzerland (3), Belgium (2), France (2), Spain (2), Brazil (1), Denmark (1), Portugal (1), Singapore (1), Sweden (1) |
| Belgium | 8 | Austria (2), Denmark (2), Czech Republic (1), Jordan (1), Poland (1), Serbia (1) |
| Sweden | 8 | Austria (3), Belgium (1), Denmark (1), Norway (1), Singapore (1), Switzerland (1) |
| Austria | 6 | Jordan (2), Czech Republic (1), Greece (1), Ireland (1), Poland (1) |
| Brazil | 6 | Belgium (1), Portugal (1), Saudl Arabia (1), Serbia (1), Singapore (1), Switzerland (1) |
| Japan | 6 | Austria (2), France (1), Greece (1), Singapore (1), Spain (1) |
| Canada | 5 | Belgium (2), Germany (2), Spain (1) |
| Burkina Faso | 4 | Cambodia (1), Cameroon (1), Egypt (1), Senegal (1) |
| Cambodia | 3 | Cameroon (1), Egypt (1), Senegal (1) |
| Singapore | 3 | Austria (1), Denmark (1), U Arab Emirates (1) |

(continued next page)

**S1 Table** (continued)

| **From** | **Freq** | **To (Countries with collaboration)** |
| --- | --- | --- |
| Korea | 3 | Brazil (1), Singapore (1), Vietnam (1) |
| Poland | 2 | Czech Republic (1), Jordan (1) |
| Chile | 2 | Argentina (1), Barbados (1) |
| South Africa | 2 | Indonesia (1), Malawi (1) |
| Turkey | 2 | Chile (2) |
| Cameroon | 2 | Egypt (1), Senegal (1) |
| Argentina | 1 | Barbados (1) |
| Egypt | 1 | Senegal (1) |
| India | 1 | Saudl Arabia (1) |
| Iran | 1 | Malaysia (1) |
| Jordan | 1 | Czech Republic (1) |

**S2 Table** Most cited countries

| **Country** | **TC** | **AAC** | **Country** | **TC** | **AAC** |
| --- | --- | --- | --- | --- | --- |
| USA | 4522 | 32.30 | NORWAY | 48 | 6.90 |
| UNITED KINGDOM | 829 | 28.60 | SPAIN | 44 | 7.30 |
| CANADA | 538 | 41.40 | IRAN | 29 | 4.80 |
| NETHERLANDS | 521 | 28.90 | PORTUGAL | 28 | 9.30 |
| ITALY | 386 | 29.70 | IRELAND | 27 | 13.50 |
| GERMANY | 379 | 27.10 | KUWAIT | 26 | 26.00 |
| AUSTRALIA | 261 | 13.70 | RUSSIA | 23 | 23.00 |
| BELGIUM | 242 | 60.50 | SINGAPORE | 13 | 13.00 |
| CHINA | 217 | 5.60 | GREECE | 10 | 10.00 |
| SWEDEN | 161 | 17.90 | SOUTH AFRICA | 10 | 5.00 |
| DENMARK | 143 | 35.80 | INDIA | 9 | 2.20 |
| JAPAN | 91 | 8.30 | SWITZERLAND | 9 | 9.00 |
| FRANCE | 90 | 10.00 | MALAWI | 6 | 6.00 |
| TURKEY | 90 | 18.00 | CROATIA | 5 | 5.00 |
| MEXICO | 55 | 18.30 | INDONESIA | 4 | 4.00 |
| POLAND | 53 | 17.70 | FINLAND | 3 | 3.00 |
| KOREA | 52 | 5.20 | UGANDA | 3 | 3.00 |
| AUSTRIA | 49 | 24.50 | CHILE | 0 | 0.00 |
| BRAZIL | 48 | 12.00 | ROMANIA | 0 | 0.00 |

**Notes:**

**Abbreviations:** TC, Total Citation; AAC, Average Article Citation.

**S3 Table** Primary source journal (minimum observation 2)

| **Sources** | **Articles** |
| --- | --- |
| JOURNAL OF STROKE & CEREBROVASCULAR DISEASES | 4 |
| JOURNAL OF THE AMERICAN ACADEMY OF CHILD AND ADOLESCENT PSYCHIATRY | 4 |
| NEUROLOGICAL SCIENCES | 4 |
| SUPPORTIVE CARE IN CANCER | 4 |
| BJU INTERNATIONAL | 3 |
| BMC CANCER | 3 |
| BRITISH DENTAL JOURNAL | 3 |
| CHILD PSYCHIATRY & HUMAN DEVELOPMENT | 3 |
| COMPREHENSIVE PSYCHIATRY | 3 |
| DIGITAL HEALTH | 3 |
| INTERNATIONAL JOURNAL OF ENVIRONMENTAL RESEARCH AND PUBLIC HEALTH | 3 |
| JOURNAL OF ALZHEIMERS DISEASE | 3 |
| JOURNAL OF PAIN AND SYMPTOM MANAGEMENT | 3 |
| PSYCHIATRY RESEARCH | 3 |
| PSYCHO-ONCOLOGY | 3 |
| TRIALS | 3 |
| AGING & MENTAL HEALTH | 2 |
| BMC CARDIOVASCULAR DISORDERS | 2 |
| BMC PSYCHIATRY | 2 |
| BMJ OPEN | 2 |
| BREAST | 2 |
| BRITISH JOURNAL OF DERMATOLOGY | 2 |
| CANCER NURSING | 2 |

(continued next page)

**S3 Table** (continued)

| **Sources** | **Articles** |
| --- | --- |
| CLINICAL AND EXPERIMENTAL DERMATOLOGY | 2 |
| CLINICAL JOURNAL OF ONCOLOGY NURSING | 2 |
| DIABETIC MEDICINE | 2 |
| CLINICAL TRIALS | 2 |
| DISEASES OF THE COLON & RECTUM | 2 |
| EUROPEAN JOURNAL OF CANCER | 2 |
| GENERAL HOSPITAL PSYCHIATRY | 2 |
| INTERNATIONAL JOURNAL OF BEHAVIORAL NUTRITION AND PHYSICAL ACTIVITY | 2 |
| INTERNATIONAL JOURNAL OF METHODS IN PSYCHIATRIC RESEARCH | 2 |
| INTERNATIONAL JOURNAL OF SOCIAL PSYCHIATRY | 2 |
| INTERNATIONAL JOURNAL OF UROLOGY | 2 |
| INTERNATIONAL PSYCHOGERIATRICS | 2 |
| JAMA NETWORK OPEN | 2 |
| JOURNAL OF CLINICAL MEDICINE | 2 |
| JOURNAL OF GENERAL INTERNAL MEDICINE | 2 |
| JOURNAL OF INTELLECTUAL DISABILITY RESEARCH | 2 |
| JOURNAL OF NERVOUS AND MENTAL DISEASE | 2 |
| JOURNAL OF ORAL REHABILITATION | 2 |
| JOURNAL OF PEDIATRIC NURSING-NURSING CARE OF CHILDREN & FAMILIES | 2 |
| JOURNAL OF PSYCHOPATHOLOGY AND BEHAVIORAL ASSESSMENT | 2 |
| JOURNAL OF REHABILITATION MEDICINE | 2 |
| JOURNAL OF THE AMERICAN ACADEMY OF DERMATOLOGY | 2 |
| MEDICINE | 2 |

(continued next page)

**S3 Table** (continued)

| **Sources** | **Articles** |
| --- | --- |
| NORDIC JOURNAL OF PSYCHIATRY | 2 |
| NUTRIENTS | 2 |
| PAIN MANAGEMENT NURSING | 2 |
| RESEARCH IN DEVELOPMENTAL DISABILITIES | 2 |
| RESEARCH IN GERONTOLOGICAL NURSING | 2 |
| SCANDINAVIAN JOURNAL OF GASTROENTEROLOGY | 2 |
| SOCIAL PSYCHIATRY AND PSYCHIATRIC EPIDEMIOLOGY | 2 |
| STROKE | 2 |

**S4 Table** Extension of Table 4 (minimum observation 20)

| **Author(s), Year, Journal** | **DOI** | **TC** | **TCY** | **NTC** |
| --- | --- | --- | --- | --- |
| BECH P, 2014, J AFFECT DISORDERS | 10.1016/j.jad.2013.12.005 | 81 | 6.75 | 2.91 |
| HANSON LLM, 2014, SCAND J PUBLIC HEALT | 10.1177/1403494813500591 | 81 | 6.75 | 2.91 |
| PHILP I, 2013, J STROKE CEREBROVASC | 10.1016/j.jstrokecerebrovasdis.2012.10.016 | 79 | 6.08 | 4.56 |
| RUHÉ HG, 2005, COMPR PSYCHIAT | 10.1016/j.comppsych.2005.03.001 | 77 | 3.67 | 3.14 |
| SILOVE D, 2007, J NERV MENT DIS | 10.1097/01.nmd.0000254747.03333.70 | 73 | 3.84 | 1.67 |
| ARBUCKLE RA, 2009, VALUE HEALTH | 10.1111/j.1524-4733.2009.00571.x | 66 | 3.88 | 2.31 |
| RECKLITIS CJ, 2007, PSYCHO-ONCOLOGY | 10.1002/pon.1069 | 66 | 3.47 | 1.51 |
| BOYLE MH, 1997, ARCH GEN PSYCHIAT | NA | 65 | 2.24 | 3.13 |
| LAMB BW, 2012, ANN SURG ONCOL | 10.1245/s10434-011-2187-0 | 65 | 4.64 | 1.60 |
| LEE B, 2008, INT J SOC PSYCHIATR | 10.1177/0020764006074995 | 64 | 3.56 | 3.20 |
| VAN HEUGTEN C, 2007, CLIN NEUROL NEUROSUR | 10.1016/j.clineuro.2006.10.002 | 62 | 3.26 | 1.42 |
| BOYSAN M, 2017, PSYCHIAT CLIN PSYCH | 10.1080/24750573.2017.1342769 | 57 | 6.33 | 0.85 |
| MOY ML, 2009, J REHABIL RES DEV | 10.1682/JRRD.2008.07.0083 | 52 | 3.06 | 1.82 |
| LALLAS A, 2015, BRIT J DERMATOL | 10.1111/bjd.14045 | 52 | 4.73 | 2.59 |
| WILLIAMS PD, 2012, CANCER NURS | 10.1097/NCC.0b013e31821a51f6 | 52 | 3.71 | 1.28 |

(continued next page)

**S4 Table** (continued)

| **Author(s), Year, Journal** | **DOI** | **TC** | **TCY** | **NTC** |
| --- | --- | --- | --- | --- |
| KEEFE M, 1990, CLIN EXP DERMATOL | 10.1111/j.1365-2230.1990.tb02064.x | 49 | 1.36 | 0.32 |
| TOMATA Y, 2017, GERIATR GERONTOL INT | 10.1111/ggi.12864 | 48 | 5.33 | 0.72 |
| GAYNES BN, 2010, ANN FAM MED | 10.1370/afm.1092 | 48 | 3.00 | 1.82 |
| ERSEK M, 2010, PAIN MED | 10.1111/j.1526-4637.2009.00787.x | 47 | 2.94 | 1.78 |
| MASI G, 2015, J AFFECT DISORDERS | 10.1016/j.jad.2015.05.069 | 46 | 4.18 | 2.29 |
| SHELBY RA, 2005, J TRAUMA STRESS | 10.1002/jts.20033 | 46 | 2.19 | 1.87 |
| STEIN KD, 2003, J PAIN SYMPTOM MANAG | 10.1016/S0885-3924(03)00321-X | 46 | 2.00 | 0.54 |
| KRAMER JA, 2000, EUR J CANCER | 10.1016/S0959-8049(00)00134-9 | 46 | 1.77 | 2.49 |
| ANDERSON C, 2016, J UROLOGY | 10.1016/j.juro.2016.03.151 | 45 | 4.50 | 0.46 |
| COMPTON CC, 1997, ARCH PATHOL LAB MED-a-b | NA | 45 | 1.55 | 2.17 |
| FORTY L, 2009, J AFFECT DISORDERS | 10.1016/j.jad.2008.07.017 | 44 | 2.59 | 1.54 |
| WILLIAMS JW, 2004, INT J PSYCHIAT MED | 10.2190/U1B0-NKWC-568V-4MAK | 43 | 1.95 | 0.59 |
| WARD AB, 2014, INT J STROKE | 10.1111/ijs.12291 | 42 | 3.50 | 1.51 |
| LÜTTGES J, 1999, DIGEST SURG | 10.1159/000018738 | 42 | 1.56 | 3.42 |

(continued next page)

**S4 Table** (continued)

| **Author(s), Year, Journal** | **DOI** | **TC** | **TCY** | **NTC** |
| --- | --- | --- | --- | --- |
| BOYLE MH, 2017, INT J METH PSYCH RES | 10.1002/mpr.1544 | 41 | 4.56 | 0.61 |
| KENNEDY BL, 2001, PSYCHIAT QUART | 10.1023/A:1010357216925 | 41 | 1.64 | 1.68 |
| HAENSSLE HA, 2010, J AM ACAD DERMATOL | 10.1016/j.jaad.2009.08.049 | 41 | 2.56 | 1.56 |
| SUAREZ-IBARROLA R, 2019, BJU INT | 10.1111/bju.14557 | 40 | 5.71 | 2.51 |
| MARTÍNEZ-DE JESÚS FR, 2010, INT J LOW EXTR WOUND | 10.1177/1534734610371594 | 39 | 2.44 | 1.48 |
| LI XM, 2009, AIDS CARE | 10.1080/09540120802195119 | 39 | 2.29 | 1.36 |
| LEARDMANN CA, 2021, JAMA NETW OPEN | 10.1001/jamanetworkopen.2021.8072 | 38 | 7.60 | 7.51 |
| STEEL JL, 2011, INJURY | 10.1016/j.injury.2010.11.045 | 37 | 2.47 | 0.84 |
| DE HAES JCJM, 1998, ANN ONCOL | 10.1023/A:1008282806910 | 37 | 1.32 | 0.41 |
| MASON SJ, 2018, BJU INT | 10.1111/bju.14368 | 36 | 4.50 | 2.54 |
| SYED HR, 2008, BMC PSYCHIATRY | 10.1186/1471-244X-8-59 | 35 | 1.94 | 1.75 |
| LACKNER JB, 1993, J NERV MENT DIS | 10.1097/00005053-199310000-00010 | 34 | 1.03 | 1.74 |
| VAN ROOZENDAAL BW, 2009, PHARM WORLD SCI | 10.1007/s11096-009-9312-1 | 33 | 1.94 | 1.15 |
| LUNDIN A, 2015, J AFFECT DISORDERS | 10.1016/j.jad.2015.05.024 | 32 | 2.91 | 1.59 |

(continued next page)

**S4 Table** (continued)

| **Author(s), Year, Journal** | **DOI** | **TC** | **TCY** | **NTC** |
| --- | --- | --- | --- | --- |
| DORLAND HF, 2016, J CANCER SURVIV | 10.1007/s11764-015-0500-9 | 32 | 3.20 | 0.33 |
| REY JM, 1992, J AFFECT DISORDERS | 10.1016/0165-0327(92)90029-6 | 32 | 0.94 | 1.04 |
| HILLER W, 1990, J AFFECT DISORDERS | 10.1016/0165-0327(90)90055-D | 32 | 0.89 | 0.21 |
| WILLIAMS PD, 2013, CANCER NURS | 10.1097/NCC.0b013e3182595406 | 31 | 2.38 | 1.79 |
| SCHMIDT KN, 2013, SUPPORT CARE CANCER | 10.1007/s00520-012-1483-y | 31 | 2.38 | 1.79 |
| DUVIVIER AWP, 1991, CLIN EXP DERMATOL | 10.1111/j.1365-2230.1991.tb00397.x | 31 | 0.89 | 1.72 |
| LEWIN AB, 2005, J CLIN PSYCHOL MED S | 10.1007/s10880-005-7817-x | 30 | 1.43 | 1.22 |
| UCHIDA M, 2014, J AFFECT DISORDERS | 10.1016/j.jad.2014.04.021 | 30 | 2.50 | 1.08 |
| KURMAN RJ, 1999, ARCH PATHOL LAB MED | NA | 30 | 1.11 | 2.44 |
| ALLEN J, 2009, J CLIN NURS | 10.1111/j.1365-2702.2008.02731.x | 29 | 1.71 | 1.01 |
| MOHANTY SK, 2007, BMC CANCER | 10.1186/1471-2407-7-144 | 29 | 1.53 | 0.66 |
| HOFFMANN T, 2012, TOP STROKE REHABIL | 10.1310/tsr1905-417 | 29 | 2.07 | 0.72 |

(continued next page)

**S4 Table** (continued)

| **Author(s), Year, Journal** | **DOI** | **TC** | **TCY** | **NTC** |
| --- | --- | --- | --- | --- |
| MERPORT A, 2012, J PEDIATR PSYCHOL | 10.1093/jpepsy/jss050 | 29 | 2.07 | 0.72 |
| MINNERUP J, 2016, STROKE | 10.1161/STROKEAHA.115.011695 | 29 | 2.90 | 0.30 |
| HENSON DE, 1994, ARCH PATHOL LAB MED | NA | 29 | 0.91 | 0.41 |
| KANG HP, 2009, AM J CLIN PATHOL | 10.1309/AJCPQZXR1NMF2VDX | 28 | 1.65 | 0.98 |
| ROJAHN J, 2011, RES DEV DISABIL | 10.1016/j.ridd.2011.07.035 | 28 | 1.87 | 0.63 |
| PAUSCHARDT J, 2010, J ANXIETY DISORD | 10.1016/j.janxdis.2010.03.002 | 28 | 1.75 | 1.06 |
| KRUIJVER IPM, 2006, PATIENT EDUC COUNS | 10.1016/j.pec.2005.10.001 | 28 | 1.40 | 0.64 |
| BERTELLI M, 2012, RES DEV DISABIL | 10.1016/j.ridd.2011.08.020 | 27 | 1.93 | 0.67 |
| DELL'OSSO B, 2020, ANN GEN PSYCHIATR | 10.1186/s12991-020-00306-2 | 27 | 4.50 | 3.18 |
| RYBAKOWSKI JK, 2012, EUR PSYCHIAT | 10.1016/j.eurpsy.2010.12.001 | 26 | 1.86 | 0.64 |
| AL-TURKAIT FA, 2011, PSYCHOPATHOLOGY | 10.1159/000322797 | 26 | 1.73 | 0.59 |
| RHIEM K, 2019, BREAST J | 10.1111/tbj.13257 | 26 | 3.71 | 1.63 |
| RODGERS C, 2018, J PEDIATR ONCOL NURS | 10.1177/1043454218764889 | 26 | 3.25 | 1.83 |

(continued next page)

**S4 Table** (continued)

| **Author(s), Year, Journal** | **DOI** | **TC** | **TCY** | **NTC** |
| --- | --- | --- | --- | --- |
| RASMUSSEN NA, 2005, NORD J PSYCHIAT | 10.1080/08039480510023025 | 26 | 1.24 | 1.06 |
| OSAROGIAGBON RU, 2015, ANN THORAC SURG | 10.1016/j.athoracsur.2014.09.049 | 25 | 2.27 | 1.24 |
| RYBAKOWSKI J, 2010, EUR ARCH PSY CLIN N | 10.1007/s00406-009-0030-4 | 25 | 1.56 | 0.95 |
| HANNA B, 2004, JOGNN-J OBST GYN NEO | 10.1177/0884217504262972 | 25 | 1.14 | 0.34 |
| COMPTON CC, 1997, ARCH PATHOL LAB MED | NA | 25 | 0.86 | 1.20 |
| CREER TL, 1983, J ASTHMA | 10.3109/02770908309077072 | 25 | 0.58 | 1.00 |
| DUCHARME S, 2019, J ALZHEIMERS DIS | 10.3233/JAD-180839 | 24 | 3.43 | 1.50 |
| DE WAAL MWM, 2009, SOC PSYCH PSYCH EPID | 10.1007/s00127-008-0410-5 | 24 | 1.41 | 0.84 |
| DONNARUMMA V, 2018, J ORAL REHABIL | 10.1111/joor.12614 | 24 | 3.00 | 1.69 |
| ST PIERRE A, 2010, J PEDIATR NURS | 10.1016/j.pedn.2009.04.009 | 23 | 1.44 | 0.87 |
| IMPERATORI C, 2020, NUTRIENTS | 10.3390/nu12030674 | 23 | 3.83 | 2.71 |
| CHEN IH, 2020, INT J ENV RES PUB HE | 10.3390/ijerph17082737 | 23 | 3.83 | 2.71 |

(continued next page)

**S4 Table** (continued)

| **Author(s), Year, Journal** | **DOI** | **TC** | **TCY** | **NTC** |
| --- | --- | --- | --- | --- |
| MOSOLOV SN, 2014, J AFFECT DISORDERS | 10.1016/j.jad.2013.10.029 | 23 | 1.92 | 0.83 |
| CHEN M, 2013, J NEUROINTERV SURG | 10.1136/neurintsurg-2011-010137 | 23 | 1.77 | 1.33 |
| TERHORST L, 2011, PSYCHO-ONCOLOGY | 10.1002/pon.1806 | 23 | 1.53 | 0.52 |
| REDSELL SA, 2016, CHILD OBES | 10.1089/chi.2015.0246 | 22 | 2.20 | 0.23 |
| HALLGREN KA, 2022, J GEN INTERN MED | 10.1007/s11606-021-07038-3 | 22 | 5.50 | 5.79 |
| ARDAKANI A, 2016, IRAN J PUBLIC HEALTH | NA | 22 | 2.20 | 0.23 |
| HADJISTAVROPOULOS T, 2018, EUR J PAIN | 10.1002/ejp.1177 | 22 | 2.75 | 1.55 |
| LENNON O, 2020, FRONT NEUROSCI-SWITZ | 10.3389/fnins.2020.00578 | 22 | 3.67 | 2.59 |
| CHEN M, 2013, J NEUROINTERV SURG | 10.1136/neurintsurg-2011-010137 | 23 | 1.77 | 1.33 |
| TERHORST L, 2011, PSYCHO-ONCOLOGY | 10.1002/pon.1806 | 23 | 1.53 | 0.52 |
| REDSELL SA, 2016, CHILD OBES | 10.1089/chi.2015.0246 | 22 | 2.20 | 0.23 |
| HALLGREN KA, 2022, J GEN INTERN MED | 10.1007/s11606-021-07038-3 | 22 | 5.50 | 5.79 |
| ARDAKANI A, 2016, IRAN J PUBLIC HEALTH | NA | 22 | 2.20 | 0.23 |

(continued next page)

**S4 Table** (continued)

| **Author(s), Year, Journal** | **DOI** | **TC** | **TCY** | **NTC** |
| --- | --- | --- | --- | --- |
| HADJISTAVROPOULOS T, 2018, EUR J PAIN | 10.1002/ejp.1177 | 22 | 2.75 | 1.55 |
| LENNON O, 2020, FRONT NEUROSCI-SWITZ | 10.3389/fnins.2020.00578 | 22 | 3.67 | 2.59 |
| COSTA-REQUENA G, 2010, PSYCHO-ONCOLOGY | 10.1002/pon.1601 | 22 | 1.38 | 0.84 |
| SOARES JB, 2016, EUR J GASTROEN HEPAT | 10.1097/MEG.0000000000000701 | 21 | 2.10 | 0.22 |
| SINGH NN, 2006, BEHAV MODIF | 10.1177/0145445506286700 | 21 | 1.05 | 0.48 |
| ZHOU QH, 2018, SCI REP-UK | 10.1038/s41598-018-19268-3 | 21 | 2.63 | 1.48 |
| MOZETIC V, 2019, TRIALS | 10.1186/s13063-019-3868-4 | 21 | 3.00 | 1.32 |
| VAN VLIET P, 2016, J NEUROL PHYS THER | 10.1097/NPT.0000000000000133 | 21 | 2.10 | 0.22 |
| LIU W, 2005, MELANOMA RES | 10.1097/00008390-200512000-00011 | 21 | 1.00 | 0.86 |
| KAPLAN CP, 1998, BRAIN INJURY | 10.1080/026990598122674 | 21 | 0.75 | 0.24 |
| IM GY, 2014, CLIN LIVER DIS | 10.1016/j.cld.2014.01.006 | 20 | 1.67 | 0.72 |
| BEDDIS HP, 2014, BRIT DENT J | 10.1038/sj.bdj.2014.862 | 20 | 1.67 | 0.72 |
| TURNER GM, 2019, BMC FAM PRACT | 10.1186/s12875-018-0894-3 | 20 | 2.86 | 1.25 |
| COUSSON-GÉLIE F, 2010, J HEALTH PSYCHOL | 10.1177/1359105310364438 | 20 | 1.25 | 0.76 |

(continued next page)

**S4 Table** (continued)

| **Author(s), Year, Journal** | **DOI** | **TC** | **TCY** | **NTC** |
| --- | --- | --- | --- | --- |
| MALINOVSZKY KM, 2004, BREAST | 10.1016/j.breast.2004.02.009 | 20 | 0.91 | 0.27 |

**Notes:**

**Abbreviations:** TC, Total Citation; TCY, Total Citation per Year; NTC, Normalized Total Citation.

**Standardised Keywords**

**words_removes**

p53

pembrolizumab

nevi

icf rehabilitation set

f-18-fdg pet/ct

**Standardised Keywords**

**words_synonyms**

physician, physicians

challenge, challenges

cancer, carcinoma, malignant-tumors

diagnosis, diagnoses

randomized controlled trial, randomized clinical-trial, randomized controlled-trial, randomized controlled-trials, randomized clinical-trials

mental-disorders, psychiatric-disorders, psychiatric-disorder

cardiopulmonary-resuscitation, cpr

risk-factor, risk-factors

prognostic factors, prognostic-factors, factors influencing prognosis

assessment tools, assessment-tool

tool, tools

adenocarcinoma, adenoma

adolescents, adolescent

acute myeloid-leukemia, aml

attention-deficit hyperactivity, adhd

antidepressant, antidepressants

association, associations

autism spectrum disorder, autism spectrum disorders

beck depression inventory, bdi-ii

bipolar disorder, bipolar disorders, bipolar-disorder

cancer patients, cancer-patients

caregivers, carers

chronic disease, chronic illness

comorbidity, co-morbidity

trial, trials

deficit hyperactivity disorder, deficit/hyperactivity disorder

depression inventory, depression scale

design, designs

disorder, disorders

dsm-iv, dsm-5

experience, experiences

features, traits

germline mutation, germline mutations

guidelines, guideline

health-care professionals, health-professionals

disease, illness

improve, improvement

index, indexes

intervention, interventions

major depression, major depressive disorder

meta-analysis, metaanalysis

mini-mental state, mini-mental-state

model, models

mood disorder, mood disorders

need, needs

negative affect, negative affectivity

network, networks

neoplasia, neoplasms

older-adults, older-people

ptsd checklist, pcl-c, pcl-5, pcl-r

posttraumatic-stress-disorder, ptsd

posttraumatic stress symptoms, ptsd symptoms

perspective, perspectives

pharmacotherapy, pharmacological-treatment

patient health questionnaire-9, phq-9

scl-90, scl-90-r

predictor, predictors

prognostic-significance, prognostic value

program, programs

proposal, proposals

psychologic distress, psychological distress

radiotherapy, radiation-therapy

rating-scale, rating-scales

risk, risks

sample, samples

scale, scales

health survey sf-36, sf-36, sf-36 health survey

spectrum disorder, spectrum disorders

states, state

temporomandibular disorders, tmd

tumor, tumors

youth, youths

parent, parents

instrument, instruments
